# Supplementary material for: Usability, Acceptance, and Effectiveness of a Coach-Guided, App-Based Mental Health Intervention: The beWell Tirol Pilot Study
Source: Research Square preprint supplement (doi:10.21203/rs.3.rs-8152998/v1), 2026-01-13
Supplement: Supplementary file 1 [file 088228bdec2d7bc8321d82ef.docx]

**Supplementary Material 1. Participant Satisfaction Scale (beWell Tirol)***Developed by S. Granz und V. Demuth*
*Medical University of Innsbruck*
*Version: 2023*

This scale was developed to assess participant satisfaction with the beWell Tirol digital mental-health intervention. It consists of 10 items rated on a 4-point Likert scale (1 = strongly disagree to 4 = strongly agree).

**Response format:**
1 = strongly disagree, 2 = disagree, 3 = agree, 4 = strongly agree

**Participant Satisfaction Scale (beWell Tirol)**

| **Statements** |
| --- |
| I was satisfied with the app. | strongly disagree | disagree | agree | strongly agree |
| The program has had a positive impact on my well-being. | strongly disagree | disagree | agree | strongly agree |
| I know people around me who would benefit from the program. | strongly disagree | disagree | agree | strongly agree |
| I think the program would be successful as a comprehensive prevention program in Tyrol (e.g. via doctors' surgeries). | strongly disagree | disagree | agree | strongly agree |
| The background information on the modules was helpful. | strongly disagree | disagree | agree | strongly agree |
| I found the support from a coach useful. | strongly disagree | disagree | agree | strongly agree |
| The program would have been similarly successful without a coach. | strongly disagree | disagree | agree | strongly agree |
| I would have liked personal (face-to-face) meetings. | strongly disagree | disagree | agree | strongly agree |
| I was satisfied with the format of the one-to-one video sessions. | strongly disagree | disagree | agree | strongly agree |
| I would have liked video sessions in a group setting with other participants. | strongly disagree | disagree | agree | strongly agree |

**Suggested citation:**
Granz, S & Demuth, V. (2023). *Participant Satisfaction Scale for the beWell Tirol intervention* [Unpublished instrument]. Medical University of Innsbruck.
